# Supplementary material for: New Cytogenetic Photomap and Molecular Diagnostics for the Cryptic Species of the Malaria Mosquitoes Anopheles messeae and Anopheles daciae from Eurasia
Source: MDPI journal article supplement (doi:10.3390/insects12090835), 2021-09-17
Supplement: s1 [file s1]

Table S1. Mosquito collections used for the development of the standard-universal chromosome map and illustration of the inversion variant composition. Species were identified by the PCR-RFLP approach using the *RsaI* endonuclease.

| Chromosomal variant | Species                                   | Populations                                                                                      |
|---------------------|-------------------------------------------|--------------------------------------------------------------------------------------------------|
| X00                 | <i>An. daciae</i>                         | Dzerzhinskoye, 08/14/2018                                                                        |
| X01                 | <i>An. daciae</i>                         | Kansk 07/11/2019                                                                                 |
| X11                 | <i>An. daciae</i> ,<br><i>An. messeae</i> | Barnaul, 06/09/2019,<br>Krivosheino, 07/18/2018                                                  |
| X12                 | <i>An. messeae</i>                        | Barnaul, 06/09/2019                                                                              |
| X22                 | <i>An. messeae</i>                        | Semipalatinsk, 08/22/2017                                                                        |
| 2R00                | <i>An. daciae</i>                         | Kolarovo, 07/03/18                                                                               |
| 2R01                | <i>An. messeae</i>                        | Barnaul, 06/09/2019                                                                              |
| 2R11                | <i>An. messeae</i>                        | Krivosheino, 07/18/2018<br>Teguldet, 08/22/18                                                    |
| 3R00                | <i>An. daciae</i>                         | Barnaul, 06/09/2019,<br>Kolarovo, 07/03/2018,                                                    |
| 3R01                | <i>An. daciae</i> ,<br><i>An. messeae</i> | Dzerzhinskoye, 08/14/2018,<br>Krivosheino, 07/18/2018                                            |
| 3R11                | <i>An. messeae</i>                        | Barnaul, 06/09/2018,<br>Zelenogorsk, 07/17/2018,<br>Kansk 07/11/2019,<br>Krivosheino, 07/18/2018 |
| 3L00                | <i>An. daciae</i>                         | Dzerzhinskoye, 08/14/2018,<br>Kolarovo, 07/03/2018                                               |
| 3L01                | <i>An. messeae</i>                        | Barnaul, 06/09/2019                                                                              |
| 3L11                | <i>An. messeae</i>                        | Dzerzhinskoye, 08/14/2018,<br>Kargasok, 07/18/2019,<br>Noyabrsk, 07/27/2019                      |

Table S2. Genotyping results for specimens based on ITS2 sequences. Letters in sample numbers indicate their locations: IR—Irkutsk; KZ—Kazakhstan, Semey; LR—Latvia, Riga; NB or NB(V)—Novosibirsk, Berdsk (collection “V”); T(B) or T(D)—Teguldet, pond B or D. The presence of double picks in ITS2 sequences (SNP) are indicated by the IUPAC nucleotide ambiguity code as letters M(A+C), R(A+G), S(C+G), W(A+T), and Y (C+T).

| Sample number | Accession number | Species            | SNP |     |     |     |     |     |
|---------------|------------------|--------------------|-----|-----|-----|-----|-----|-----|
|               |                  |                    | 150 | 211 | 215 | 217 | 412 | 432 |
| IR3           | MZ578242         | <i>An. messeae</i> | M   | T   | T   | C   | G   | G   |
| IR4           | MZ578243         | <i>An. messeae</i> | M   | T   | T   | C   | G   | G   |
| KZ18          | MZ578244         | Hybrid             | M   | T   | T   | C   | R   | S   |
| KZ3           | MZ578245         | <i>An. messeae</i> | M   | T   | T   | C   | G   | G   |
| KZ4           | MZ578246         | <i>An. messeae</i> | M   | T   | T   | C   | G   | G   |
| KZ6           | MZ578247         | Hybrid             | M   | T   | T   | C   | R   | S   |

|         |          |                    |   |   |   |   |   |   |
|---------|----------|--------------------|---|---|---|---|---|---|
| LR11    | MZ578248 | <i>An. daciae</i>  | C | A | W | Y | A | C |
| LR12    | MZ578249 | <i>An. messeae</i> | M | T | T | C | G | G |
| LR17    | MZ578250 | <i>An. daciae</i>  | C | W | W | Y | A | C |
| LR2     | MZ578251 | <i>An. daciae</i>  | C | W | W | Y | A | C |
| LR8     | MZ578252 | <i>An. daciae</i>  | C | W | W | Y | A | C |
| LR9     | MZ578253 | <i>An. messeae</i> | M | T | T | C | G | G |
| NB(V)17 | MZ578254 | Hybrid             | C | T | T | Y | R | S |
| NB15    | MZ578255 | <i>An. messeae</i> | M | T | T | C | G | G |
| NB16    | MZ578256 | <i>An. messeae</i> | M | T | T | C | G | G |
| NB19    | MZ578257 | <i>An. messeae</i> | M | T | T | C | G | G |
| NB20    | MZ578258 | <i>An. messeae</i> | M | T | T | C | G | G |
| NB5     | MZ578259 | <i>An. messeae</i> | M | T | T | C | G | G |
| T(B)12  | MZ578260 | <i>An. daciae</i>  | C | W | W | Y | A | C |
| T(B)2   | MZ578261 | <i>An. daciae</i>  | C | W | W | Y | A | C |
| T(B)27  | MZ578262 | <i>An. daciae</i>  | C | W | W | Y | A | C |
| T(D)17  | MZ578263 | Hybrid             | C | W | W | Y | R | S |
| T(D)31  | MZ578264 | Hybrid             | C | W | W | Y | R | S |

Table S3. Karyotyping of the specimens based on RFLP analysis of ITS2 sequence.

| <b>Sample ID</b> | <b>Species</b>     | <b>XL</b> | <b>2R</b> | <b>3R</b> | <b>3L</b> |
|------------------|--------------------|-----------|-----------|-----------|-----------|
| Teg_20           | <i>An. messeae</i> | 1         | 11        | 11        | 00        |
| Teg_21           | <i>An. messeae</i> | 12        | 11        | 01        | 00        |
| Teg_22           | <i>An. messeae</i> | 11        | 01        | 01        | 00        |
| Teg_23           | <i>An. messeae</i> | 11        | 11        | 01        | 00        |
| Teg_24           | <i>An. daciae</i>  | 11        | 00        | 00        | 00        |
| Teg_25           | <i>An. messeae</i> | 1         | 11        | 01        | 00        |
| Teg_26           | <i>An. messeae</i> | 12        | 11        | 00        | 00        |
| Teg_27           | <i>An. daciae</i>  | 1         | 00        | 00        | 00        |
| Teg_28           | <i>An. messeae</i> | 11        | 00        | 01        | 00        |
| Teg_29           | <i>An. daciae</i>  | 11        | 00        | 00        | 00        |
| Teg_30           | <i>An. messeae</i> | 11        | 11        | 11        | 00        |
| Teg_31           | <i>An. messeae</i> | 11        | 01        | 01        | 00        |
| Teg_32           | <i>An. messeae</i> | 12        | 11        | 01        | 00        |
| Teg_33           | <i>An. messeae</i> | 11        | 11        | 01        | 01        |
| Teg_34           | <i>An. messeae</i> | 11        | 11        | 01        | 11        |
| Teg_35           | <i>An. messeae</i> | 11        | 11        | 01        | 00        |
| Teg_37           | <i>An. daciae</i>  | 11        | 00        | 00        | 00        |
| Teg_38           | <i>An. daciae</i>  | 11        | 00        | 00        | 00        |
| Teg_39           | <i>An. messeae</i> | 1         | 11        | 01        | 00        |
| Teg_40           | <i>An. messeae</i> | 11        | 11        | 01        | 00        |

|        |                    |    |    |    |    |
|--------|--------------------|----|----|----|----|
| Teg_41 | <i>An. messeae</i> | 11 | 11 | 11 | 00 |
| Teg_42 | <i>An. messeae</i> | 11 | 01 | 01 | 00 |
| Teg_43 | <i>An. daciae</i>  | 00 | 00 | 01 | 00 |
| Teg_44 | <i>An. messeae</i> | 2  | 11 | 01 | 00 |
| Teg_45 | <i>An. messeae</i> | 1  | 11 | 00 | 00 |
| Teg_47 | <i>An. messeae</i> | 1  | 11 | 01 | 00 |
| Teg_48 | <i>An. messeae</i> | 11 | 11 | 11 | 00 |
| Teg_49 | <i>An. daciae</i>  | 11 | 00 | 00 | 00 |
| Teg_50 | <i>An. messeae</i> | 12 | 11 | 00 | 01 |
| Teg_52 | <i>An. messeae</i> | 1  | 11 | 01 | 01 |
| Teg_53 | <i>An. messeae</i> | 1  | 11 | 01 | 00 |
| Teg_54 | <i>An. messeae</i> | 12 | 11 | 00 | 00 |
| Teg_55 | <i>An. messeae</i> | 11 | 11 | 01 | 00 |
| Teg_57 | <i>An. messeae</i> | 11 | 11 | 00 | 00 |
| Teg_58 | <i>An. messeae</i> | 2  | 11 | 01 | 01 |
| Teg_59 | <i>An. messeae</i> | 12 | 11 | 00 | 00 |
| Teg_60 | <i>An. messeae</i> | 11 | 11 | 01 | 00 |
| Teg_61 | <i>An. messeae</i> | 12 | 11 | 11 | 00 |
| Teg_62 | <i>An. daciae</i>  | 01 | 00 | 00 | 00 |
| Teg_63 | <i>An. messeae</i> | 22 | 11 | 01 | 00 |
| Teg_64 | <i>An. daciae</i>  | 1  | 00 | 00 | 00 |
| Teg_66 | <i>An. messeae</i> | 11 | 11 | 00 | 00 |
| Teg_67 | <i>An. messeae</i> | 12 | 11 | 11 | 00 |
| Teg_68 | <i>An. messeae</i> | 1  | 11 | 00 | 00 |
| Teg_69 | <i>An. messeae</i> | 1  | 11 | 00 | 00 |
| Teg_70 | <i>An. messeae</i> | 11 | 11 | 00 | 00 |
| Teg_73 | <i>An. messeae</i> | 12 | 11 | 00 | 00 |
| Teg_77 | <i>An. messeae</i> | 11 | 11 | 01 | 00 |
| Teg_78 | <i>An. messeae</i> | 11 | 11 | 11 | 00 |
| Teg_79 | <i>An. messeae</i> | 11 | 11 | 00 | 00 |
| Teg_80 | <i>An. messeae</i> | 1  | 11 | 11 | 00 |
| Teg_81 | <i>An. messeae</i> | 1  | 11 | 01 | 00 |
| Teg_82 | <i>An. messeae</i> | 1  | 11 | 11 | 00 |
| Teg_83 | <i>An. daciae</i>  | 01 | 00 | 00 | 00 |
| Teg_84 | <i>An. messeae</i> | 12 | 11 | 01 | 00 |
| Teg_85 | <i>An. messeae</i> | 12 | 11 | 11 | 00 |
| Teg_86 | <i>An. messeae</i> | 1  | 11 | 00 | 00 |
| Teg_87 | <i>An. messeae</i> | 11 | 11 | 00 | 00 |
