# Supplementary figures and images for: New Cytogenetic Photomap and Molecular Diagnostics for the Cryptic Species of the Malaria Mosquitoes Anopheles messeae and Anopheles daciae from Eurasia
Source: MDPI journal article supplement (doi:10.3390/insects12090835), 2021-09-17

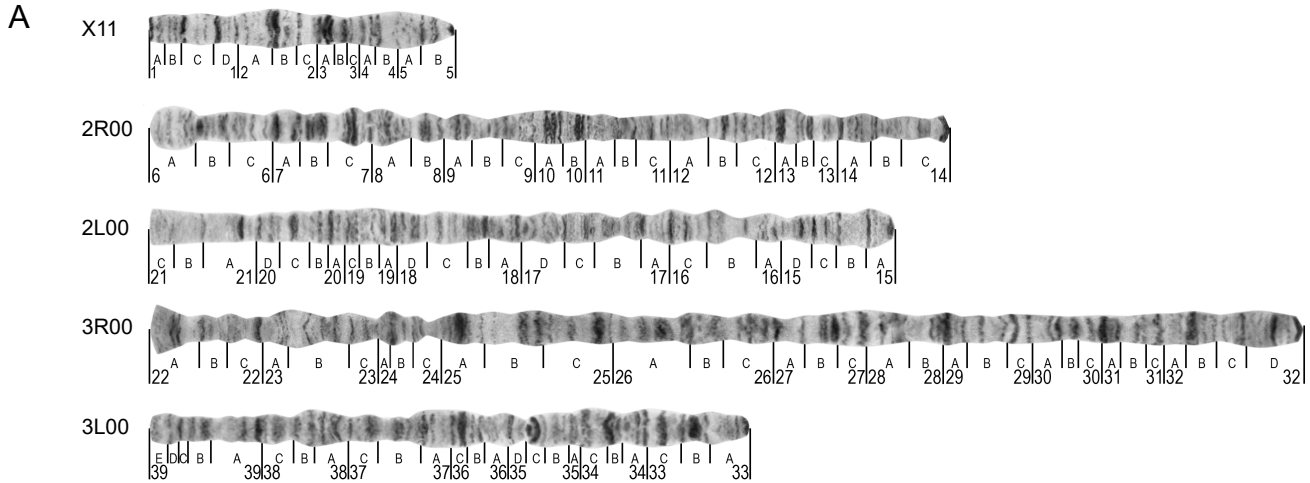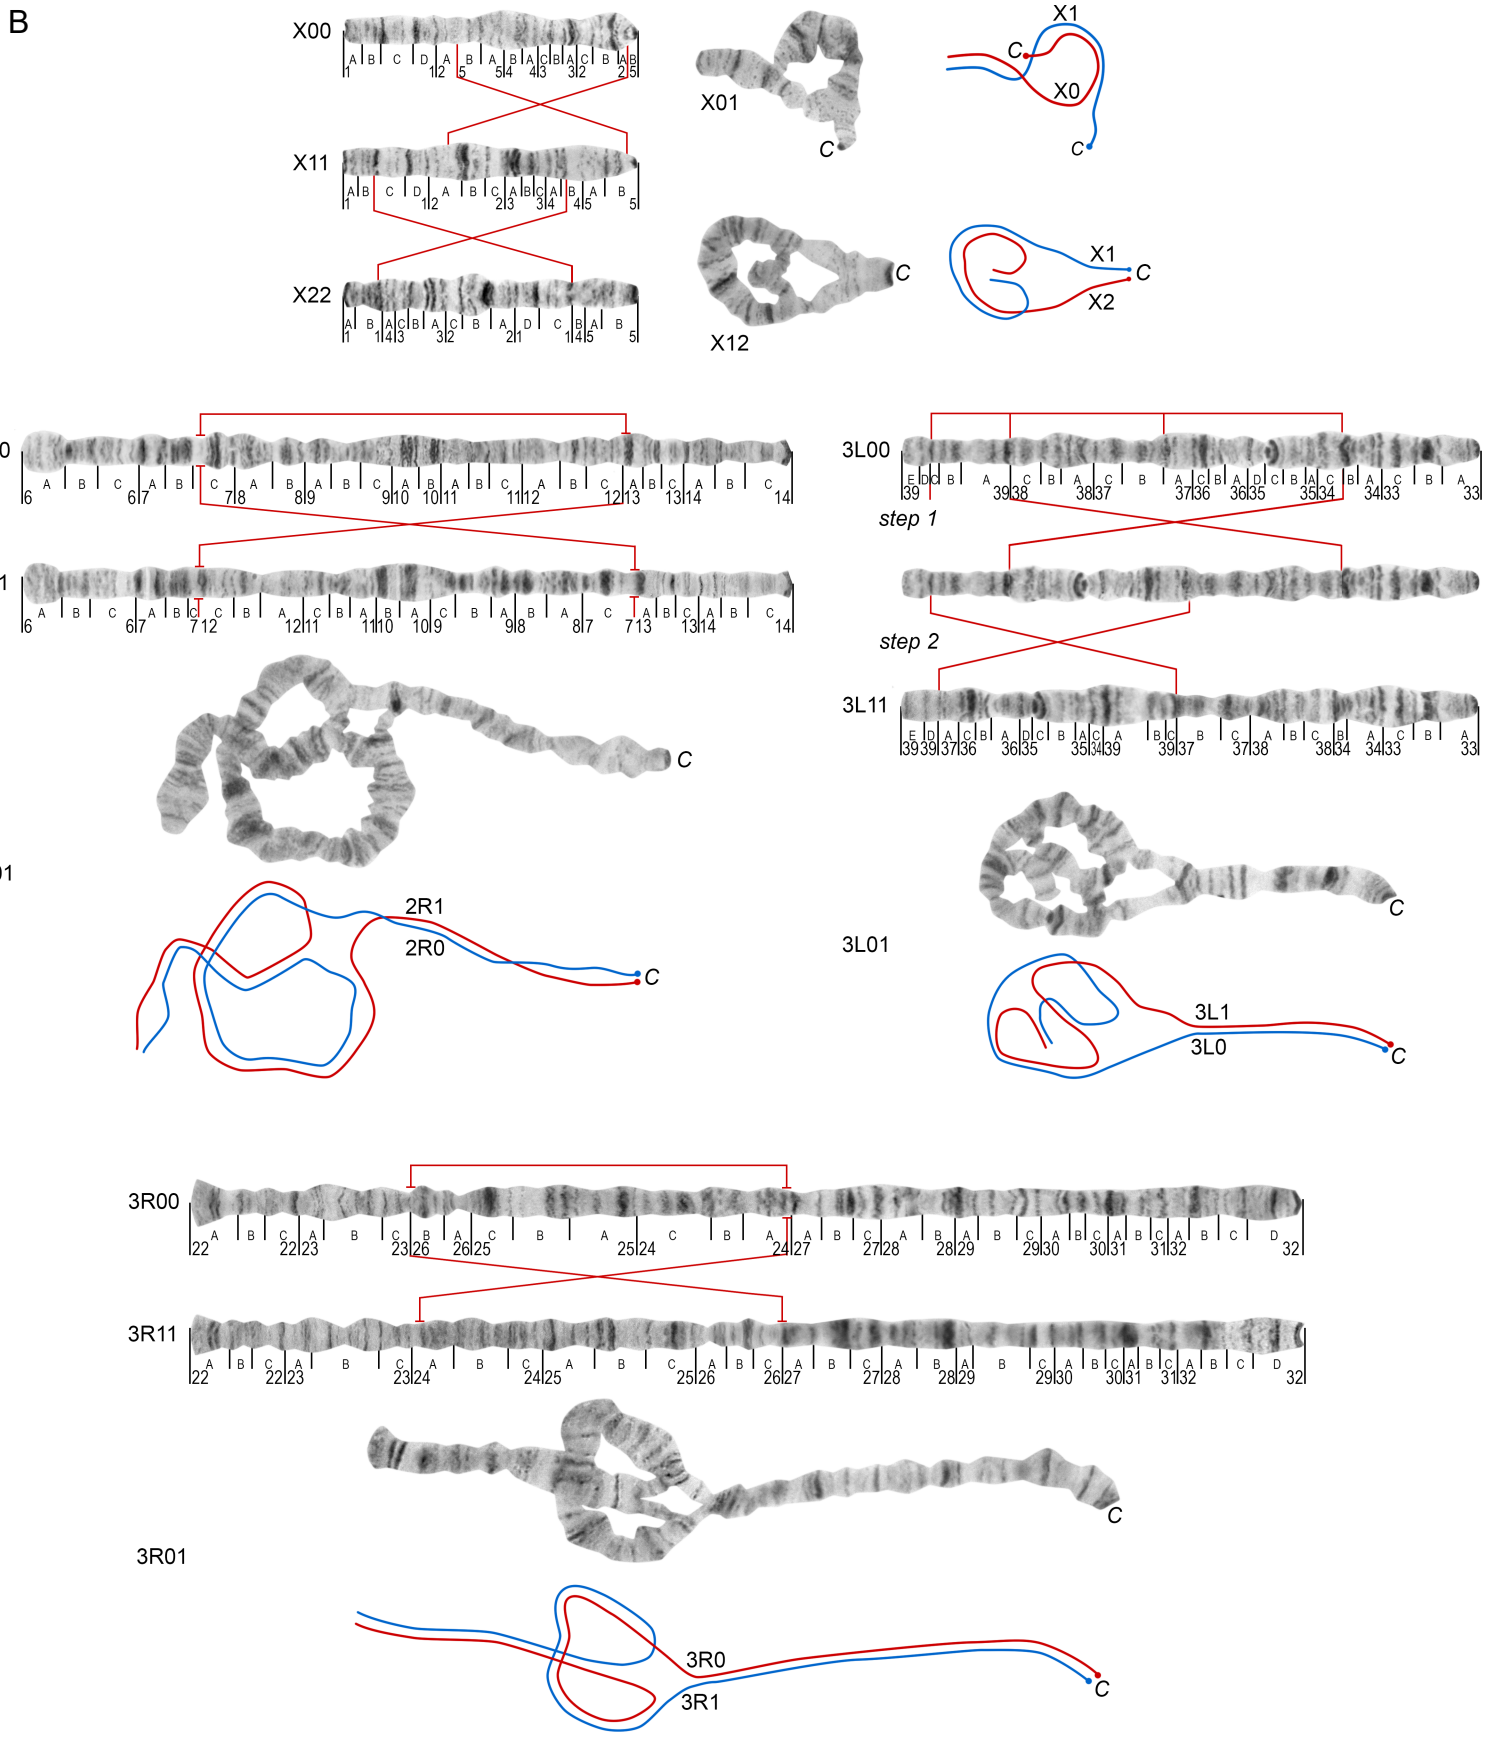

Supplement: s1 [file s1]
